# Supplementary material for: Antibody structure prediction using interpretable deep learning
Source: PubMed Central journal article supplement — Patterns (N Y). 2021 Dec 9;3(2):100406. doi: 10.1016/j.patter.2021.100406 (PMC8848015; doi:10.1016/j.patter.2021.100406), 2021-12-09
Supplement: mmc1.pdf [file mmc1.pdf]

**Patterns, Volume 3**

**Supplemental information**

**Antibody structure prediction using  
interpretable deep learning**

**Jeffrey A. Ruffolo, Jeremias Sulam, and Jeffrey J. Gray**

## Supplemental Information

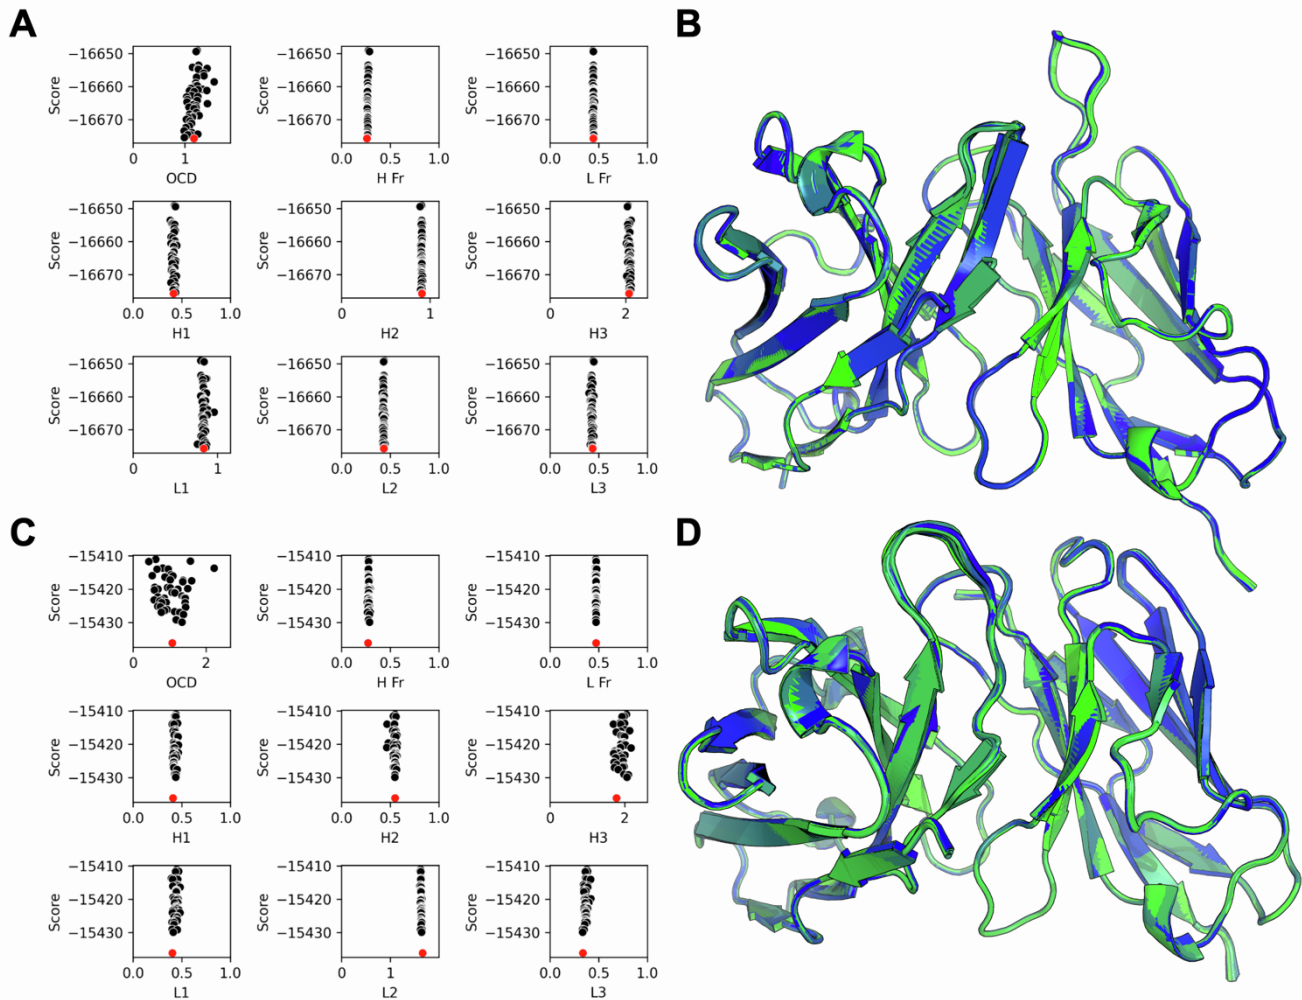

**Figure S1. Convergence of predicted structures for two benchmark examples.** (A) Funnel plots showing accuracy (OCD, RMSD) versus score for 50 DeepAb decoys for target 3PP3 (therapeutic benchmark), with low-scoring structure in red. (B) Superimposed decoy structures for target 3PP3. (C) Funnel plots showing accuracy (OCD, RMSD) versus score for 50 DeepAb decoys for target 3I9G (RosettaAntibody benchmark), with low-scoring structure in red. (D) Superimposed decoy structures for target 3I9G.

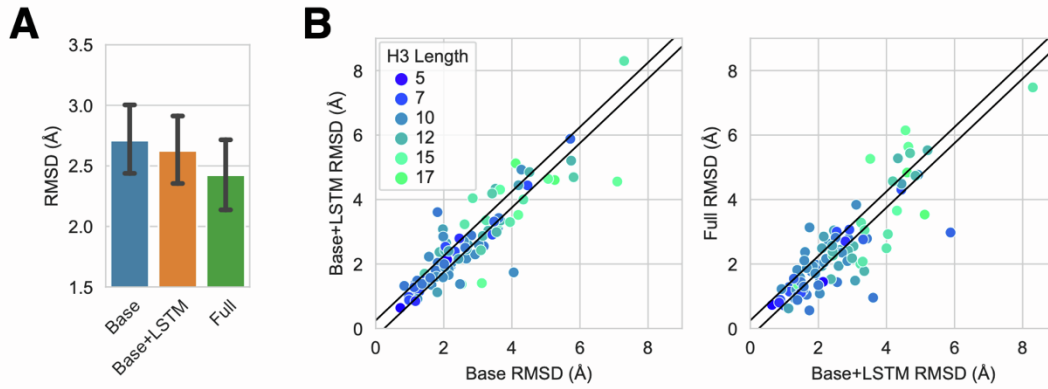

**Figure S2. Impact of architecture additions on H3 loop accuracy.** (A) Average RMSD of H3 loops predicted by baseline model (without LSTM features or CCA), baseline model with LSTM features, and full model. Error bars show standard deviations for each model on each benchmark. (B) Direct comparison of H3 RMSD for each target as architecture is expanded, with diagonal bands indicating predictions that were within  $\pm 0.25$  Å. Point color indicates H3 loop length for each target.

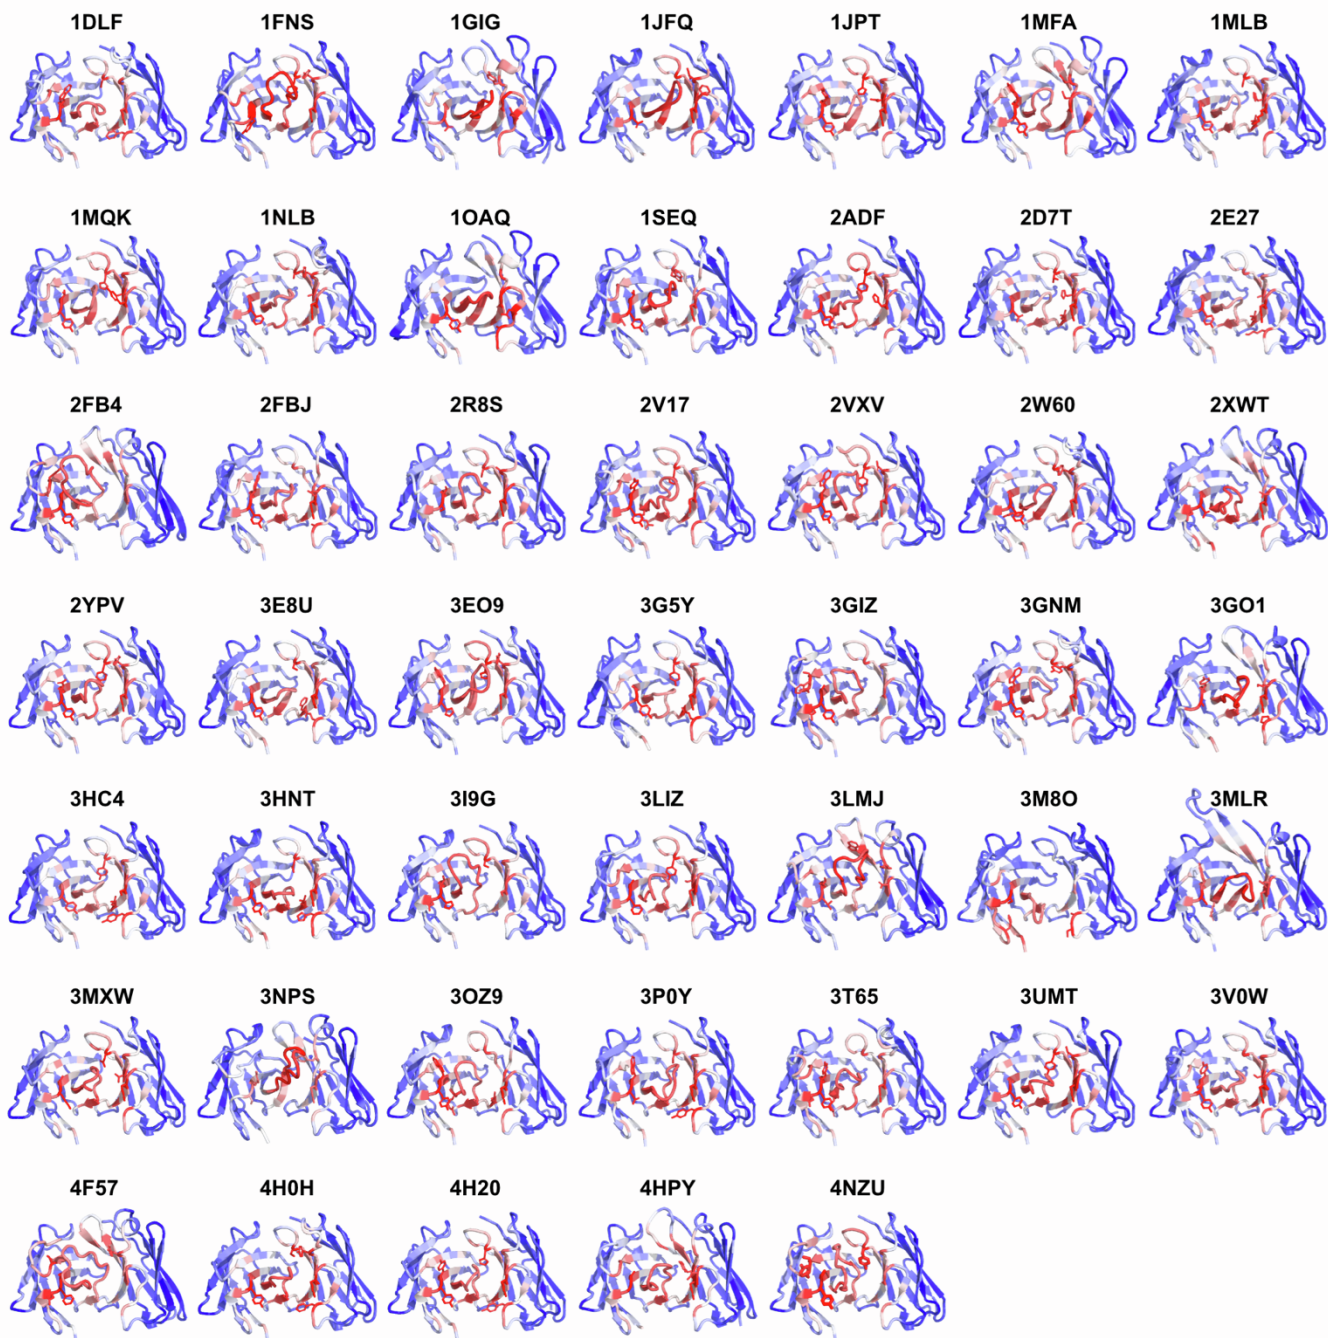

**Figure S3. H3 loop attention for RosettaAntibody benchmark targets.** Model  $C_{\alpha}$  attention while predicting H3 loop structures for each of the 47 targets in the RosettaAntibody benchmark. Attention values increase from blue to red. For each target, the side chains of the five most attended non-H3 residues are represented as sticks.

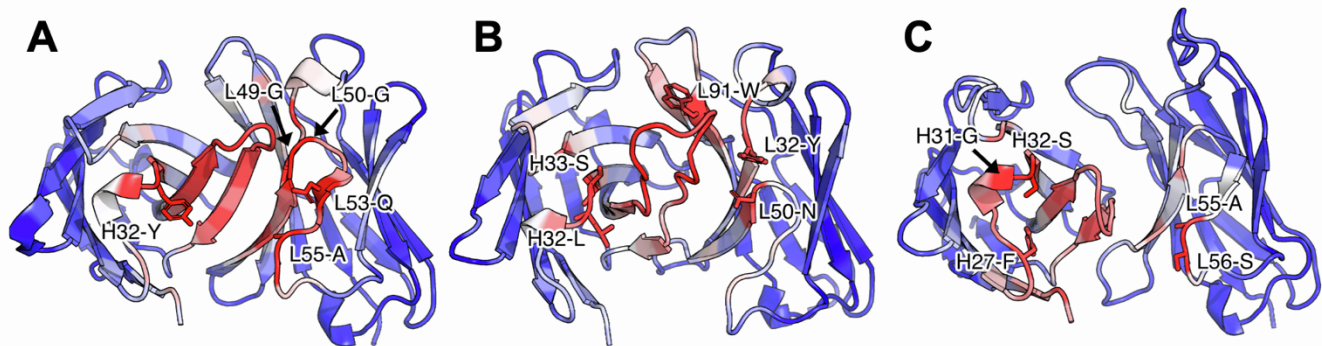

**Figure S4. Variability of key residues identified by attention mechanism.** Model  $C_{\alpha}$  attention while predicting H3 loop structures for three targets in the RosettaAntibody benchmark. Attention values increase from blue to red. For each target, the side chains of the five most attended non-H3 residues are represented as sticks. (A) H3 attention for 1OAQ prediction. (B) H3 attention for 3MLJ prediction. (C) H3 attention for 3M8O prediction.

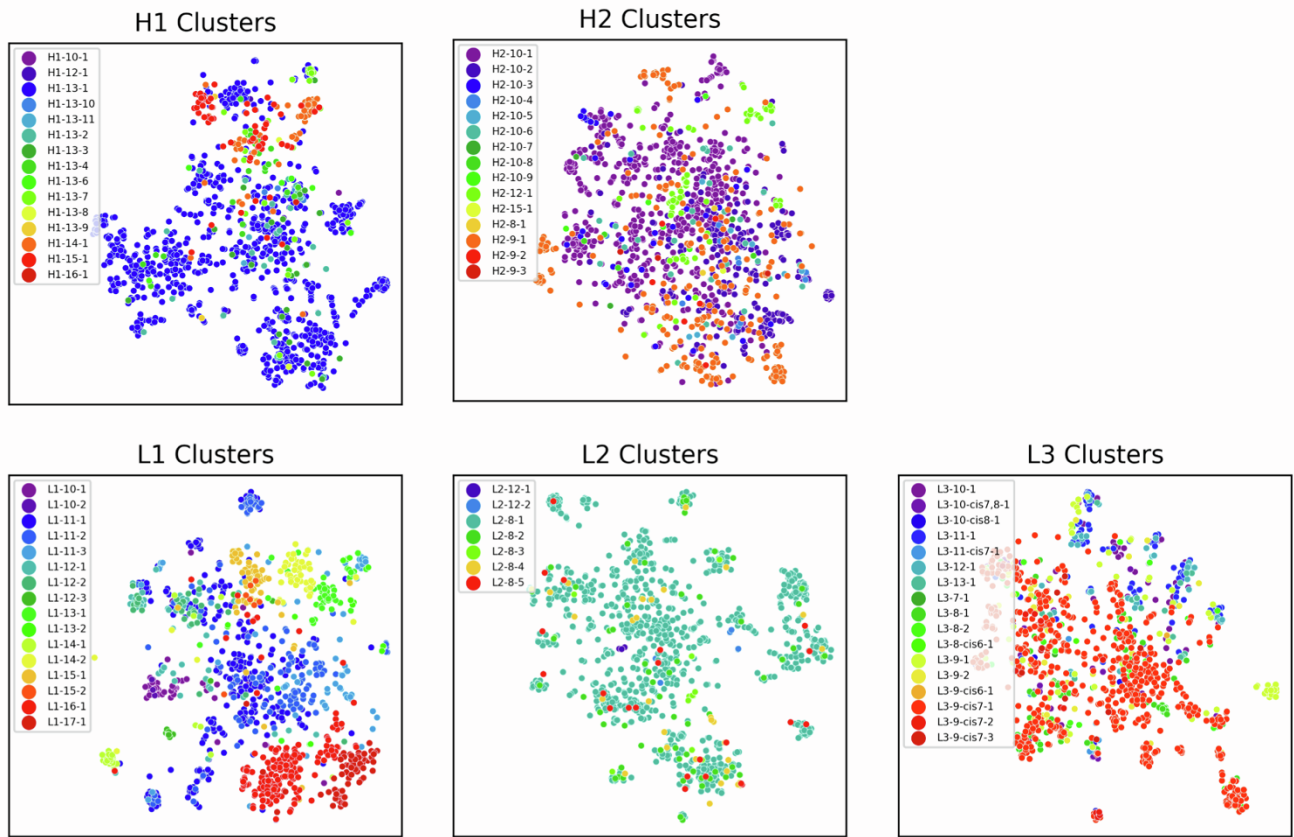

**Figure S5. Non-H3 CDR loop t-SNE embeddings labeled by structural clusters.** CDR-specific embeddings are created by averaging the bi-LSTM encoder hidden states of residues for each CDR loop.

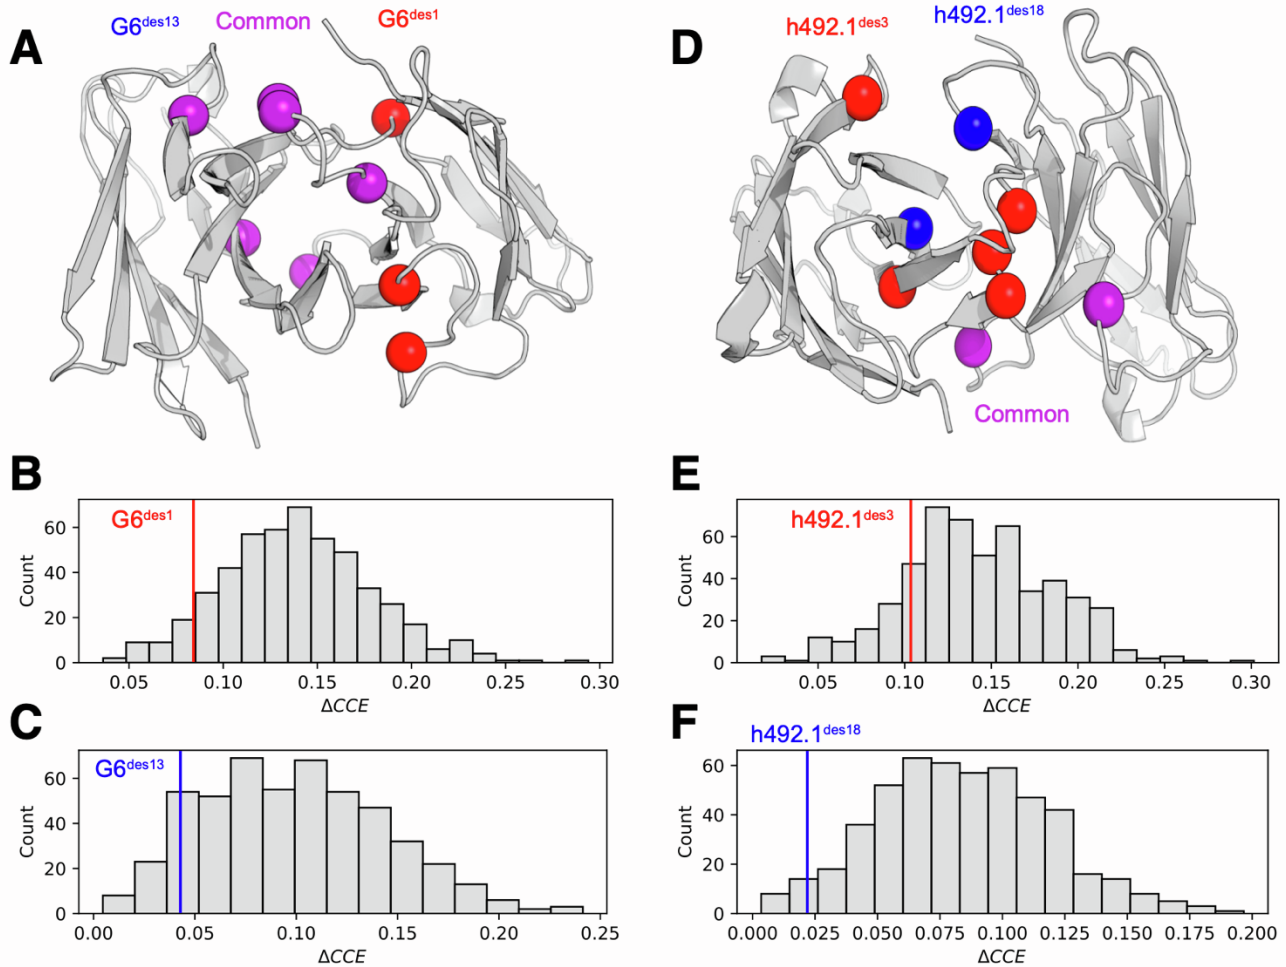

**Figure S6. Identification of stable multi-point variants for two AbLIFT designs.** Both wild type structures were present in the training dataset, resulting in a slight bias for the native sequence. (A) Mutation positions for two anti-VEGF multi-point variants presented by Warszawski *et al.*. (B) Comparison of  $\Delta CCE$  values for  $G6^{des1}$  (nine-point variant) and random nine-point variants at the same positions. (C) Comparison of  $\Delta CCE$  values for  $G6^{des13}$  (six-point variant) and random six-point variants at the same positions. (D) Mutation positions for two anti-QSOX1 multi-point variants. (E) Comparison of  $\Delta CCE$  values for  $h492.1^{des3}$  (seven-point variant) and random seven-point variants at the same positions. (F) Comparison of  $\Delta CCE$  values for  $h492.1^{des18}$  (four-point variant) and random four-point variants at the same positions.

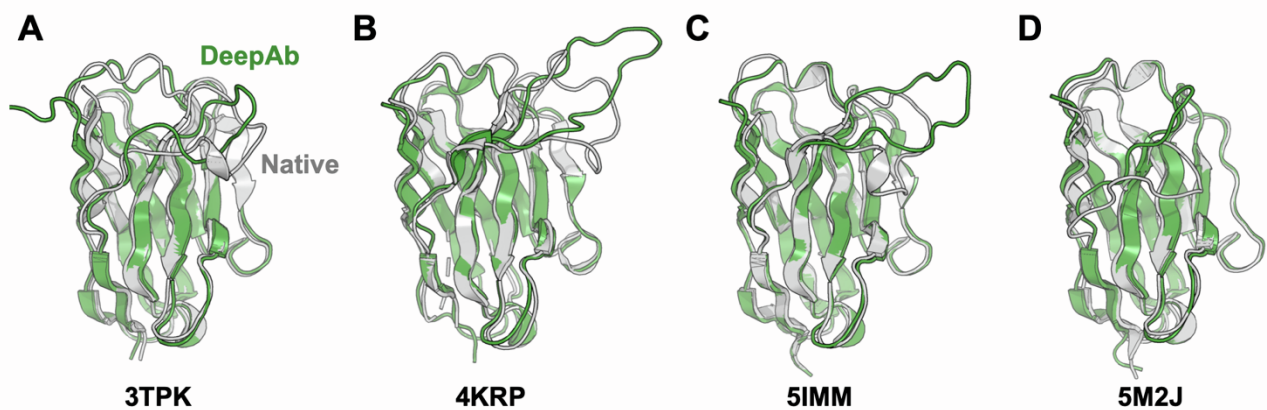

**Figure S7. Nanobody structures predicted by DeepAb.** Four nanobody structures predicted by DeepAb (green) aligned to native structures (gray). Prediction accuracy is reported as RMSDs over the framework region and the three CDR loops. (A) Predicted structure for nanobody 3TPK (framework: 0.58 Å, CDR1: 3.29 Å, CDR2: 1.07 Å, CDR3: 4.73 Å). (B) Predicted structure for nanobody 4KRP (framework: 0.82 Å, CDR1: 2.36 Å, CDR2: 2.07 Å, CDR3: 5.56 Å). (C) Predicted structure for nanobody 5IMM (framework: 0.46 Å, CDR1: 1.89 Å, CDR2: 0.58 Å, CDR3: 7.60 Å). (D) Predicted structure for nanobody 5M2J (framework: 1.01 Å, CDR1: 1.12 Å, CDR2: 0.86 Å, CDR3: 8.34 Å)



**Table S1. CDR loop RMSD and OCD results for DeepAb on RosettaAntibody benchmark.**

| Target      | OCD   | H Fr (Å) | H1 (Å) | H2 (Å) | H3 (Å) | L Fr (Å) | L1 (Å) | L2 (Å) | L3 (Å) |
|-------------|-------|----------|--------|--------|--------|----------|--------|--------|--------|
| 1dlf        | 6.04  | 0.65     | 0.92   | 0.82   | 3.84   | 0.51     | 0.37   | 0.64   | 0.32   |
| 1fns        | 1.72  | 0.37     | 0.62   | 1.15   | 2.01   | 0.32     | 0.51   | 0.27   | 0.51   |
| 1gig        | 1.95  | 0.39     | 0.64   | 0.47   | 2.49   | 0.47     | 0.36   | 0.99   | 1.14   |
| 1jfq        | 3.20  | 0.49     | 0.49   | 1.07   | 1.10   | 0.33     | 0.43   | 0.21   | 0.54   |
| 1jpt        | 1.42  | 0.43     | 0.36   | 0.67   | 1.29   | 0.24     | 0.72   | 0.41   | 0.37   |
| 1mfa        | 2.08  | 0.45     | 0.50   | 0.69   | 1.45   | 0.29     | 0.89   | 0.41   | 1.24   |
| 1mlb        | 5.36  | 0.46     | 0.42   | 0.60   | 1.14   | 0.42     | 0.44   | 0.76   | 0.64   |
| 1mqk        | 2.68  | 0.24     | 0.29   | 0.34   | 1.04   | 0.48     | 0.46   | 0.38   | 1.76   |
| 1nlb        | 3.21  | 0.27     | 0.21   | 0.59   | 0.56   | 0.50     | 0.77   | 0.33   | 0.35   |
| 1oaq        | 1.33  | 0.39     | 0.37   | 0.67   | 1.93   | 0.38     | 0.58   | 0.39   | 0.40   |
| 1seq        | 2.45  | 0.39     | 0.66   | 0.58   | 2.93   | 0.36     | 0.41   | 0.20   | 0.40   |
| 2adf        | 2.87  | 0.42     | 0.48   | 0.61   | 1.77   | 0.53     | 0.75   | 0.28   | 0.59   |
| 2d7t        | 15.91 | 0.65     | 0.80   | 0.78   | 2.27   | 0.44     | 0.42   | 0.36   | 1.00   |
| 2e27        | 3.29  | 0.34     | 0.54   | 0.53   | 4.30   | 0.58     | 0.71   | 0.49   | 1.90   |
| 2fb4        | 5.83  | 0.34     | 0.30   | 0.34   | 3.53   | 0.88     | 0.91   | 0.47   | 0.63   |
| 2fbj        | 6.73  | 0.46     | 0.57   | 1.01   | 1.44   | 0.45     | 1.02   | 0.62   | 1.99   |
| 2r8s        | 2.59  | 0.48     | 0.64   | 1.83   | 2.55   | 0.37     | 0.32   | 0.41   | 0.49   |
| 2v17        | 2.12  | 0.36     | 0.44   | 1.26   | 2.44   | 0.67     | 0.69   | 0.35   | 0.86   |
| 2vxv        | 1.95  | 0.35     | 0.65   | 1.09   | 5.28   | 0.35     | 0.26   | 0.90   | 1.77   |
| 2w60        | 4.64  | 0.29     | 0.36   | 0.54   | 1.97   | 0.36     | 0.43   | 0.30   | 0.49   |
| 2xwt        | 0.46  | 0.43     | 1.24   | 0.54   | 3.13   | 0.32     | 0.61   | 1.07   | 0.99   |
| 2ypv        | 3.73  | 0.82     | 0.69   | 0.70   | 2.36   | 0.33     | 0.68   | 0.39   | 0.55   |
| 3e8u        | 3.26  | 0.48     | 0.56   | 0.59   | 1.30   | 0.37     | 0.51   | 0.42   | 0.35   |
| 3eo9        | 4.42  | 0.36     | 0.53   | 0.68   | 2.42   | 0.34     | 0.41   | 0.39   | 0.79   |
| 3g5y        | 3.75  | 0.29     | 0.52   | 0.37   | 0.72   | 0.60     | 0.24   | 0.35   | 0.42   |
| 3giz        | 2.10  | 0.37     | 0.56   | 0.43   | 1.95   | 0.31     | 0.25   | 0.28   | 0.25   |
| 3gnm        | 0.81  | 0.29     | 0.44   | 0.30   | 2.78   | 0.40     | 0.63   | 0.19   | 0.47   |
| 3go1        | 2.13  | 0.36     | 1.47   | 1.22   | 3.28   | 0.47     | 0.95   | 0.83   | 1.83   |
| 3hc4        | 4.13  | 1.02     | 0.49   | 0.99   | 0.89   | 0.41     | 0.46   | 0.30   | 0.37   |
| 3hnt        | 3.28  | 0.39     | 0.19   | 0.66   | 1.19   | 0.49     | 0.36   | 0.90   | 0.93   |
| 3i9g        | 1.24  | 0.27     | 0.41   | 0.55   | 1.78   | 0.47     | 0.40   | 1.66   | 0.34   |
| 3liz        | 1.67  | 0.33     | 0.52   | 0.37   | 4.77   | 0.50     | 0.66   | 0.32   | 0.30   |
| 3lmj        | 3.20  | 0.40     | 3.16   | 5.81   | 5.26   | 0.27     | 0.46   | 0.35   | 1.68   |
| 3m8o        | 4.42  | 0.56     | 1.48   | 1.19   | 2.98   | 0.48     | 1.49   | 0.32   | 1.08   |
| 3mlr        | 2.36  | 0.51     | 0.57   | 0.53   | 3.65   | 0.43     | 0.50   | 0.34   | -      |
| 3mxw        | 1.03  | 0.41     | 0.59   | 0.56   | 1.08   | 0.32     | 0.30   | 0.25   | 0.68   |
| 3nps        | 21.84 | 1.19     | 3.24   | 1.76   | 4.84   | 0.45     | 0.67   | 0.48   | 1.01   |
| 3oz9        | 2.89  | 0.48     | 0.53   | 0.90   | 1.21   | 0.46     | 0.85   | 0.21   | 1.52   |
| 3p0y        | 2.10  | 0.37     | 0.70   | 0.98   | 1.53   | 0.21     | 0.39   | 0.30   | 1.53   |
| 3t65        | 1.91  | 0.28     | 0.36   | 0.40   | 1.48   | 0.39     | 0.49   | 0.36   | 0.39   |
| 3umt        | 2.52  | 0.36     | 0.60   | 0.73   | 2.05   | 0.47     | 0.79   | 0.47   | 0.30   |
| 3v0w        | 4.87  | 0.42     | 0.86   | 0.53   | 0.91   | 0.44     | 0.34   | 0.33   | 0.44   |
| 4f57        | 2.22  | 0.27     | 0.32   | 1.08   | 1.36   | 0.23     | 0.34   | 0.23   | 0.73   |
| 4h0h        | 3.06  | 0.30     | 0.33   | 0.62   | 1.22   | 0.47     | 0.35   | 0.37   | 0.29   |
| 4h20        | 3.81  | 0.52     | 0.26   | 0.60   | 2.63   | 0.35     | 0.34   | 0.29   | 0.83   |
| 4hpy        | 3.71  | 0.33     | 2.58   | 0.29   | 1.94   | 0.27     | 0.66   | 0.34   | 2.23   |
| 4nzu        | 4.35  | 0.31     | 0.27   | 0.73   | 5.64   | 0.40     | 0.26   | 0.42   | 0.37   |
| <b>Mean</b> | 3.67  | 0.43     | 0.72   | 0.85   | 2.33   | 0.42     | 0.55   | 0.45   | 0.86   |
| <b>SD</b>   | 3.58  | 0.18     | 0.66   | 0.81   | 1.32   | 0.12     | 0.25   | 0.28   | 0.58   |

**Table S2. CDR loop RMSD and OCD results for DeepAb on therapeutic benchmark.**

| Target      | OCD  | H Fr (Å) | H1 (Å) | H2 (Å) | H3 (Å) | L Fr (Å) | L1 (Å) | L2 (Å) | L3 (Å) |
|-------------|------|----------|--------|--------|--------|----------|--------|--------|--------|
| 1bey        | 1.64 | 0.58     | 1.45   | 0.86   | 2.35   | 0.62     | 0.73   | 0.55   | 0.65   |
| 1cz8        | 1.92 | 0.30     | 0.64   | 0.76   | 1.65   | 0.24     | 0.30   | 0.28   | 0.38   |
| 1mim        | 1.60 | 0.49     | 0.54   | 0.49   | 1.01   | 0.36     | 0.61   | 0.48   | 0.81   |
| 1sy6        | 1.78 | 0.32     | 0.46   | 0.62   | 2.16   | 0.40     | 0.32   | 0.31   | 0.90   |
| 1yy8        | 1.78 | 0.98     | 0.49   | 0.68   | 0.62   | 0.42     | 0.57   | 0.49   | 0.74   |
| 2hwz        | 3.17 | 0.25     | 0.50   | 0.35   | 1.93   | 0.46     | 0.70   | 0.37   | 2.40   |
| 3eo0        | 2.50 | 0.31     | 3.25   | 1.05   | 4.49   | 0.27     | 1.27   | 0.23   | 0.44   |
| 3gkw        | 9.94 | 1.24     | 2.79   | 1.08   | 7.48   | 0.42     | 0.72   | 0.35   | 0.91   |
| 3nfs        | 3.88 | 0.46     | 0.44   | 0.54   | 1.10   | 0.39     | 0.65   | 0.36   | 0.84   |
| 3o2d        | 5.31 | 0.38     | 0.39   | 0.71   | 2.26   | 0.24     | 0.54   | 0.27   | 0.40   |
| 3pp3        | 1.18 | 0.26     | 0.42   | 0.91   | 2.09   | 0.45     | 0.84   | 0.43   | 0.44   |
| 3qwo        | 2.37 | 0.32     | 0.65   | 1.24   | 1.58   | 0.27     | 0.39   | 0.43   | 0.54   |
| 3u0t        | 9.53 | 0.58     | 1.60   | 0.79   | 3.07   | 0.50     | 0.83   | 0.54   | 1.01   |
| 4cni        | 3.76 | 0.32     | 0.31   | 1.02   | 2.79   | 0.44     | 0.33   | 0.39   | 0.63   |
| 4dn3        | 2.61 | 0.40     | 2.29   | 0.79   | 1.82   | 0.35     | 1.27   | 0.34   | 1.26   |
| 4g5z        | 3.98 | 0.30     | 0.36   | 0.44   | 1.45   | 0.47     | 0.30   | 0.57   | 0.46   |
| 4g6k        | 5.89 | 0.30     | 0.40   | 1.05   | 1.87   | 0.46     | 0.73   | 0.27   | 1.06   |
| 4hkz        | 4.03 | 0.25     | 0.43   | 0.46   | 3.04   | 0.26     | 0.27   | 0.28   | 0.56   |
| 4i77        | 3.24 | 0.41     | 0.89   | 1.04   | 2.37   | 0.29     | 0.80   | 0.27   | 0.60   |
| 4irz        | 1.77 | 0.38     | 0.43   | 0.52   | 3.05   | 0.41     | 1.00   | 0.41   | 1.38   |
| 4kaq        | 3.63 | 0.54     | 0.45   | 0.58   | 2.38   | 0.37     | 0.49   | 0.32   | 0.38   |
| 4m6n        | 6.05 | 0.35     | 0.70   | 0.40   | 2.76   | 0.28     | 1.32   | 0.29   | 2.02   |
| 4nyl        | 5.31 | 0.52     | 0.35   | 0.56   | 4.74   | 0.55     | 0.52   | 0.46   | 0.78   |
| 4od2        | 1.38 | 0.44     | 0.42   | 0.61   | 5.53   | 0.45     | 0.78   | 1.36   | 2.14   |
| 4ojf        | 1.35 | 0.36     | 0.28   | 1.09   | 1.71   | 0.24     | 0.42   | 0.32   | 0.55   |
| 4qyg        | 0.95 | 0.37     | 0.37   | 0.47   | 1.55   | 0.36     | 0.44   | 0.46   | 1.67   |
| 4x7s        | 1.99 | 0.37     | 1.43   | 0.65   | 2.18   | 0.29     | 0.39   | 0.22   | 0.55   |
| 4ypg        | 3.94 | 0.38     | 0.62   | 0.45   | 3.00   | 0.37     | 0.45   | 0.66   | 0.86   |
| 5csz        | 5.58 | 0.23     | 0.34   | 0.38   | 2.11   | 0.30     | 0.89   | 0.36   | 0.98   |
| 5dk3        | 4.00 | 0.32     | 0.54   | 0.58   | 2.49   | 0.33     | 0.32   | 0.55   | 0.52   |
| 5ggq        | 2.13 | 0.31     | 0.34   | 0.54   | 1.45   | 0.28     | 0.18   | 0.31   | 0.20   |
| 5ggu        | 5.51 | 0.24     | 0.43   | 0.46   | 6.14   | 0.32     | 0.27   | 0.25   | 0.34   |
| 5i5k        | 8.73 | 0.73     | 0.63   | 0.79   | 4.57   | 0.84     | 0.78   | 0.64   | 0.95   |
| 5jxe        | 3.98 | 0.29     | 0.67   | 0.46   | 2.85   | 0.59     | 0.49   | 0.58   | 0.77   |
| 5kmv        | 6.17 | 0.52     | 0.62   | 0.71   | 0.73   | 0.34     | 0.58   | 0.45   | 0.51   |
| 5l6y        | 3.89 | 0.25     | 0.47   | 0.54   | 5.44   | 0.21     | 0.28   | 0.52   | 2.29   |
| 5n2k        | 2.78 | 0.24     | 0.35   | 0.29   | 2.70   | 0.35     | 0.51   | 0.32   | 4.55   |
| 5nhw        | 2.43 | 0.29     | 0.69   | 0.48   | 0.80   | 0.26     | 0.76   | 0.37   | 4.34   |
| 5sx4        | 0.46 | 0.46     | 0.94   | 0.69   | 0.88   | 0.33     | 0.26   | 0.34   | 0.57   |
| 5tru        | 3.00 | 0.33     | 0.40   | 0.43   | 1.34   | 0.30     | 1.01   | 0.25   | 1.22   |
| 5vh3        | 3.95 | 0.31     | 0.67   | 0.36   | 0.95   | 0.40     | 0.32   | 0.38   | 0.42   |
| 5wuv        | 2.83 | 0.43     | 0.69   | 0.87   | 2.82   | 0.24     | 0.22   | 0.32   | 0.56   |
| 5xyy        | 2.99 | 0.38     | 0.54   | 0.94   | 1.30   | 0.37     | 1.10   | 0.56   | 0.44   |
| 5y9k        | 1.98 | 0.38     | 2.29   | 0.98   | 2.07   | 0.29     | 0.72   | 0.63   | 1.21   |
| 6and        | 1.56 | 0.33     | 0.58   | 0.80   | 2.57   | 0.32     | 0.52   | 0.38   | 0.51   |
| <b>Mean</b> | 3.52 | 0.40     | 0.77   | 0.68   | 2.52   | 0.37     | 0.60   | 0.42   | 1.02   |
| <b>SD</b>   | 2.16 | 0.19     | 0.67   | 0.24   | 1.50   | 0.12     | 0.30   | 0.19   | 0.92   |

**Table S3. CDR loop RMSD and OCD results for RosettaAntibody-G on RosettaAntibody benchmark.**

| Target      | OCD   | H Fr (Å) | H1 (Å) | H2 (Å) | H3 (Å) | L Fr (Å) | L1 (Å) | L2 (Å) | L3 (Å) |
|-------------|-------|----------|--------|--------|--------|----------|--------|--------|--------|
| 1dlf        | 9.61  | 0.69     | 1.17   | 1.14   | 4.92   | 0.61     | 0.67   | 1.00   | 0.64   |
| 1fns        | 3.22  | 0.58     | 0.79   | 1.20   | 4.32   | 0.35     | 0.67   | 0.44   | 1.13   |
| 1gig        | 8.70  | 0.59     | 0.68   | 0.86   | 4.35   | 0.90     | 0.78   | 2.29   | 1.00   |
| 1jfq        | 5.07  | 0.67     | 0.97   | 1.07   | 1.34   | 0.51     | 0.40   | 0.83   | 0.74   |
| 1jpt        | 6.69  | 0.52     | 1.62   | 0.99   | 1.48   | 0.30     | 0.67   | 0.90   | 0.75   |
| 1mfa        | 7.30  | 0.76     | 0.82   | 1.07   | 3.39   | 0.93     | 2.37   | 0.98   | 1.29   |
| 1mlb        | 4.15  | 0.59     | 1.23   | 0.58   | 5.45   | 0.59     | 0.54   | 1.18   | 0.85   |
| 1mqk        | 6.21  | 0.41     | 0.71   | 0.88   | 1.78   | 0.71     | 0.79   | 0.81   | 1.95   |
| 1nlb        | 4.41  | 0.52     | 0.62   | 0.52   | 1.47   | 0.55     | 0.54   | 0.79   | 0.89   |
| 1oaq        | 7.46  | 0.76     | 1.22   | 0.85   | 1.96   | 0.88     | 0.64   | 1.72   | 1.21   |
| 1seq        | 2.73  | 0.46     | 1.04   | 1.61   | 6.57   | 0.45     | 0.48   | 1.20   | 0.81   |
| 2adf        | 6.20  | 0.39     | 0.78   | 0.56   | 2.11   | 0.39     | 0.42   | 0.91   | 0.43   |
| 2d7t        | 13.32 | 0.82     | 1.07   | 0.87   | 5.90   | 0.53     | 0.56   | 0.79   | 0.98   |
| 2e27        | 4.19  | 0.33     | 0.47   | 0.36   | 3.03   | 0.57     | 0.30   | 0.63   | 1.46   |
| 2fb4        | 2.54  | 0.42     | 1.17   | 0.58   | 8.25   | 1.15     | 1.26   | 0.78   | 0.64   |
| 2fbj        | 12.86 | 0.48     | 0.83   | 0.57   | 1.38   | 0.48     | 1.15   | 0.89   | 2.18   |
| 2r8s        | 6.83  | 0.62     | 1.93   | 1.76   | 2.76   | 0.52     | 3.04   | 0.38   | 0.57   |
| 2v17        | 9.30  | 0.58     | 0.86   | 1.60   | 1.72   | 0.68     | 0.63   | 0.63   | 0.63   |
| 2vxv        | 0.86  | 0.37     | 0.90   | 1.00   | 4.40   | 0.42     | 0.30   | 0.64   | 0.62   |
| 2w60        | 2.59  | 0.54     | 1.17   | 0.62   | 0.77   | 0.74     | 0.59   | 1.25   | 0.37   |
| 2xwt        | 4.50  | 0.44     | 1.41   | 0.43   | 2.48   | 0.57     | 0.74   | 0.54   | 2.08   |
| 2ypv        | 5.19  | 0.71     | 1.03   | 0.84   | 6.09   | 0.48     | 0.35   | 0.84   | 0.59   |
| 3e8u        | 2.87  | 0.61     | 0.84   | 0.66   | 2.32   | 0.41     | 0.67   | 0.71   | 0.67   |
| 3eo9        | 5.22  | 0.49     | 1.47   | 0.91   | 2.06   | 0.43     | 0.36   | 0.78   | 0.69   |
| 3g5y        | 2.18  | 0.29     | 0.75   | 0.39   | 0.42   | 0.73     | 0.48   | 0.78   | 0.46   |
| 3gjz        | 2.69  | 0.48     | 0.74   | 0.55   | 4.86   | 0.48     | 1.98   | 0.79   | 0.68   |
| 3gnm        | 1.96  | 0.31     | 0.62   | 0.51   | 2.45   | 0.44     | 0.66   | 0.70   | 0.79   |
| 3go1        | 6.31  | 0.47     | 1.61   | 2.44   | 6.56   | 0.38     | 0.60   | 0.82   | 2.89   |
| 3hc4        | 7.98  | 1.03     | 0.57   | 1.13   | 1.39   | 0.46     | 0.55   | 0.32   | 0.26   |
| 3hnt        | 0.36  | 0.62     | 1.24   | 0.74   | 3.27   | 0.63     | 0.43   | 1.05   | 0.90   |
| 3i9g        | 5.75  | 0.52     | 0.44   | 1.06   | 2.93   | 0.61     | 0.75   | 0.78   | 0.80   |
| 3liz        | 2.71  | 0.58     | 1.41   | 0.34   | 4.57   | 0.75     | 0.34   | 0.58   | 0.37   |
| 3lmj        | 0.75  | 0.73     | 3.21   | 6.59   | 6.60   | 0.48     | 0.58   | 0.77   | 1.71   |
| 3m8o        | 8.76  | 0.64     | 2.22   | 1.04   | 8.38   | 0.46     | 1.27   | 1.03   | 1.10   |
| 3mlr        | 3.72  | 0.57     | 0.70   | 1.12   | 3.04   | 5.30     | 3.16   | 1.63   | -      |
| 3mxw        | 2.71  | 1.21     | 1.31   | 1.29   | 1.72   | 0.41     | 0.74   | 0.66   | 0.80   |
| 3nps        | 3.59  | 1.27     | 3.74   | 2.99   | 5.53   | 0.61     | 1.02   | 0.87   | 2.64   |
| 3oz9        | 10.17 | 0.54     | 0.79   | 0.88   | 2.16   | 0.61     | 0.98   | 0.94   | 2.15   |
| 3p0y        | 3.34  | 0.38     | 2.74   | 2.61   | 2.60   | 0.54     | 0.30   | 0.71   | 1.77   |
| 3t65        | 1.81  | 0.35     | 0.93   | 0.75   | 0.44   | 0.41     | 0.67   | 0.50   | 0.69   |
| 3umt        | 7.46  | 0.59     | 1.59   | 0.97   | 4.04   | 0.55     | 0.50   | 0.67   | 0.83   |
| 3v0w        | 7.14  | 0.56     | 1.53   | 1.59   | 1.74   | 0.41     | 0.51   | 0.63   | 0.99   |
| 4f57        | 4.10  | 0.58     | 1.17   | 2.46   | 8.28   | 0.69     | 1.01   | 0.92   | 1.41   |
| 4h0h        | 5.66  | 0.52     | 0.65   | 0.67   | 2.67   | 0.58     | 0.61   | 0.76   | 0.74   |
| 4h20        | 3.67  | 0.54     | 0.86   | 0.35   | 1.75   | 0.58     | 0.50   | 0.86   | 1.57   |
| 4hpy        | 3.78  | 0.38     | 2.77   | 0.61   | 0.61   | 0.54     | 0.75   | 0.97   | 1.18   |
| 4nzu        | 5.55  | 0.47     | 0.83   | 0.77   | 7.16   | 0.71     | 0.45   | 1.12   | 0.82   |
| <b>Mean</b> | 5.19  | 0.57     | 1.22   | 1.14   | 3.48   | 0.67     | 0.80   | 0.87   | 1.06   |
| <b>SD</b>   | 2.96  | 0.20     | 0.71   | 1.01   | 2.21   | 0.71     | 0.63   | 0.34   | 0.61   |

**Table S4. CDR loop RMSD and OCD results for RosettaAntibody-G on therapeutic benchmark.**

| Target      | OCD   | H Fr (Å) | H1 (Å) | H2 (Å) | H3 (Å) | L Fr (Å) | L1 (Å) | L2 (Å) | L3 (Å) |
|-------------|-------|----------|--------|--------|--------|----------|--------|--------|--------|
| 1bey        | 4.23  | 0.96     | 1.81   | 2.06   | 3.58   | 0.67     | 0.72   | 1.20   | 1.22   |
| 1cz8        | 3.32  | 0.35     | 2.82   | 0.30   | 0.40   | 0.45     | 0.75   | 0.96   | 0.61   |
| 1mim        | 13.64 | 0.63     | 1.00   | 0.74   | 0.85   | 0.63     | 1.35   | 0.98   | 2.36   |
| 1sy6        | 3.53  | 0.32     | 0.88   | 0.46   | 1.62   | 0.49     | 0.52   | 0.80   | 0.84   |
| 1yy8        | 5.26  | 1.17     | 0.99   | 1.04   | 4.84   | 0.55     | 0.58   | 0.77   | 0.71   |
| 2hwz        | 1.74  | 0.31     | 1.05   | 0.42   | 1.79   | 0.56     | 0.58   | 1.06   | 2.23   |
| 3eo0        | 5.58  | 0.72     | 2.81   | 1.61   | 9.58   | 0.39     | 1.57   | 1.13   | 0.83   |
| 3gkw        | 10.31 | 1.23     | 2.68   | 0.94   | 7.81   | 0.65     | 1.53   | 1.15   | 0.94   |
| 3nfs        | 4.31  | 0.84     | 1.80   | 1.65   | 3.34   | 0.46     | 1.00   | 0.91   | 1.38   |
| 3o2d        | 4.18  | 0.56     | 0.86   | 0.94   | 4.71   | 0.55     | 0.82   | 0.83   | 0.40   |
| 3pp3        | 2.22  | 0.53     | 0.90   | 1.30   | 4.15   | 0.54     | 1.06   | 0.90   | 0.92   |
| 3qwo        | 4.57  | 0.35     | 0.66   | 1.32   | 1.73   | 0.56     | 0.71   | 1.18   | 2.22   |
| 3u0t        | 17.22 | 0.66     | 2.22   | 1.15   | 5.15   | 0.71     | 1.17   | 0.96   | 1.40   |
| 4cni        | 9.41  | 0.58     | 0.64   | 1.30   | 3.42   | 0.52     | 0.34   | 0.79   | 0.81   |
| 4dn3        | 7.94  | 0.68     | 3.74   | 1.30   | 2.66   | 0.41     | 1.44   | 0.89   | 1.02   |
| 4g5z        | 4.56  | 0.38     | 0.79   | 0.40   | 0.56   | 0.50     | 0.31   | 0.73   | 0.53   |
| 4g6k        | 4.11  | 0.38     | 0.76   | 1.24   | 2.33   | 0.59     | 0.73   | 0.69   | 0.53   |
| 4hkz        | 4.75  | 1.07     | 1.01   | 1.00   | 3.55   | 0.59     | 0.43   | 0.46   | 0.65   |
| 4i77        | 4.27  | 0.87     | 0.90   | 1.09   | 3.10   | 0.35     | 1.10   | 0.66   | 0.53   |
| 4irz        | 2.62  | 0.64     | 1.02   | 1.26   | 3.33   | 0.58     | 0.70   | 0.80   | 1.30   |
| 4kaq        | 3.65  | 1.02     | 1.12   | 0.79   | 2.82   | 0.48     | 0.36   | 0.61   | 0.94   |
| 4m6n        | 4.57  | 0.31     | 0.66   | 0.66   | 3.81   | 0.66     | 1.27   | 0.88   | 1.57   |
| 4nyl        | 3.47  | 0.54     | 1.02   | 0.76   | 4.36   | 0.77     | 0.98   | 0.77   | 0.82   |
| 4od2        | 5.18  | 0.69     | 0.88   | 0.60   | 8.60   | 0.63     | 0.74   | 0.96   | 1.72   |
| 4ojf        | 4.80  | 0.45     | 1.05   | 1.22   | 4.98   | 0.48     | 0.27   | 1.12   | 0.73   |
| 4qyg        | 3.26  | 0.54     | 0.97   | 0.79   | 1.76   | 0.44     | 0.39   | 0.48   | 2.14   |
| 4x7s        | 5.23  | 0.62     | 1.52   | 3.26   | 2.46   | 0.57     | 0.60   | 0.60   | 0.60   |
| 4ypg        | 2.84  | 0.47     | 1.18   | 1.20   | 4.51   | 0.34     | 0.54   | 0.63   | 1.23   |
| 5csz        | 5.96  | 0.59     | 0.71   | 1.32   | 2.69   | 0.39     | 0.75   | 0.38   | 1.31   |
| 5dk3        | 1.27  | 0.56     | 2.54   | 0.73   | 0.94   | 0.34     | 0.85   | 0.52   | 0.33   |
| 5ggq        | 1.15  | 0.46     | 0.89   | 0.75   | 2.17   | 0.46     | 1.93   | 0.89   | 0.38   |
| 5ggv        | 6.62  | 0.97     | 1.20   | 1.00   | 8.20   | 0.43     | 0.43   | 0.81   | 0.61   |
| 5i5k        | 8.32  | 1.10     | 0.92   | 0.96   | 5.21   | 0.89     | 0.99   | 0.74   | 1.57   |
| 5jxe        | 3.75  | 0.50     | 3.68   | 1.66   | 5.74   | 0.68     | 1.23   | 0.68   | 0.73   |
| 5kmv        | 11.64 | 0.60     | 1.57   | 0.87   | 1.28   | 0.48     | 0.86   | 1.07   | 0.53   |
| 5l6y        | 11.90 | 0.36     | 0.72   | 0.97   | 12.57  | 0.50     | 0.58   | 0.82   | 1.87   |
| 5n2k        | 4.14  | 0.47     | 0.78   | 0.49   | 3.91   | 0.62     | 1.08   | 1.01   | 6.54   |
| 5nhw        | 3.48  | 0.46     | 2.54   | 0.68   | 1.24   | 0.68     | 0.81   | 0.82   | 5.18   |
| 5sx4        | 7.47  | 1.09     | 1.32   | 1.03   | 1.42   | 1.13     | 1.58   | 0.89   | 10.26  |
| 5tru        | 4.89  | 0.46     | 0.70   | 0.51   | 3.24   | 0.36     | 1.84   | 0.59   | 1.55   |
| 5vh3        | 2.71  | 0.51     | 1.41   | 0.70   | 3.10   | 0.56     | 0.70   | 0.76   | 0.40   |
| 5wuv        | 2.54  | 0.42     | 0.90   | 0.74   | 3.70   | 0.38     | 0.46   | 0.48   | 1.19   |
| 5xxy        | 3.82  | 0.55     | 1.46   | 2.02   | 2.63   | 0.55     | 1.19   | 0.49   | 0.53   |
| 5y9k        | 7.84  | 0.76     | 2.97   | 1.20   | 7.23   | 0.70     | 1.12   | 1.68   | 1.63   |
| 6and        | 6.16  | 0.44     | 1.62   | 0.79   | 2.69   | 0.53     | 1.07   | 0.91   | 0.67   |
| <b>Mean</b> | 5.43  | 0.63     | 1.42   | 1.05   | 3.77   | 0.55     | 0.89   | 0.83   | 1.48   |
| <b>SD</b>   | 3.32  | 0.25     | 0.83   | 0.52   | 2.53   | 0.15     | 0.41   | 0.24   | 1.76   |

**Table S5. CDR loop RMSD and OCD results for RepertoireBuilder on RosettaAntibody benchmark.**

| Target      | OCD   | H Fr (Å) | H1 (Å) | H2 (Å) | H3 (Å) | L Fr (Å) | L1 (Å) | L2 (Å) | L3 (Å) |
|-------------|-------|----------|--------|--------|--------|----------|--------|--------|--------|
| 1dlf        | 10.60 | 0.86     | 0.84   | 1.02   | 2.93   | 0.60     | 0.39   | 0.51   | 0.40   |
| 1fns        | 5.37  | 0.51     | 0.54   | 1.45   | 3.99   | 0.55     | 0.53   | 0.24   | 0.42   |
| 1gig        | 5.07  | 0.60     | 0.58   | 0.85   | 3.11   | 0.40     | 0.59   | 1.09   | 0.93   |
| 1jfq        | 3.60  | 0.65     | 0.51   | 1.15   | 1.88   | 0.34     | 0.36   | 0.41   | 0.28   |
| 1jpt        | 1.47  | 0.51     | 0.37   | 0.72   | 0.53   | 0.40     | 0.59   | 0.55   | 0.38   |
| 1mfa        | 7.63  | 0.61     | 0.52   | 0.82   | 0.41   | 0.45     | 0.70   | 0.56   | 0.49   |
| 1mlb        | 4.94  | 0.58     | 0.52   | 1.68   | 0.65   | 0.57     | 0.56   | 0.90   | 0.60   |
| 1mqk        | 4.48  | 0.34     | 0.53   | 0.83   | 1.92   | 0.46     | 0.55   | 0.50   | 2.04   |
| 1nlb        | 9.29  | 0.46     | 0.72   | 0.50   | 1.79   | 0.66     | 0.44   | 0.49   | 0.72   |
| 1oaq        | 5.63  | 0.55     | 0.50   | 0.58   | 2.14   | 0.50     | 0.58   | 0.63   | 1.02   |
| 1seq        | 7.46  | 0.62     | 0.65   | 0.72   | 3.71   | 0.37     | 0.66   | 0.35   | 0.86   |
| 2adf        | 4.67  | 0.31     | 0.60   | 0.86   | 2.51   | 0.34     | 0.46   | 0.49   | 0.32   |
| 2d7t        | 8.09  | 0.71     | 1.13   | 0.65   | 3.73   | 0.54     | 0.76   | 0.42   | 1.06   |
| 2e27        | 8.15  | 0.66     | 0.63   | 0.51   | 4.62   | 0.48     | 0.36   | 0.52   | 2.40   |
| 2fb4        | 1.45  | 0.43     | 0.43   | 0.64   | 5.29   | 0.98     | 0.79   | 0.50   | 1.45   |
| 2fbj        | 7.51  | 0.51     | 0.94   | 0.87   | 2.37   | 0.38     | 1.16   | 0.87   | 2.10   |
| 2r8s        | 1.50  | 0.50     | 0.88   | 1.86   | 2.50   | 0.45     | 0.88   | 0.62   | 1.04   |
| 2v17        | 9.98  | 0.42     | 0.50   | 1.20   | 2.34   | 0.78     | 1.03   | 0.62   | 0.65   |
| 2vxv        | 1.91  | 0.22     | 0.72   | 0.74   | 3.92   | 0.53     | 0.39   | 0.92   | 2.62   |
| 2w60        | 4.14  | 0.48     | 0.74   | 0.50   | 2.46   | 0.42     | 0.69   | 0.25   | 0.63   |
| 2xwt        | 8.67  | 0.39     | 1.43   | 0.44   | 3.63   | 0.53     | 0.36   | 0.87   | 1.51   |
| 2ypv        | 6.75  | 1.04     | 0.74   | 0.92   | 3.88   | 0.69     | 0.91   | 0.39   | 0.70   |
| 3e8u        | 4.91  | 0.73     | 0.50   | 0.66   | 1.54   | 0.42     | 0.65   | 0.45   | 0.68   |
| 3eo9        | 5.64  | 0.39     | 0.87   | 0.58   | 3.39   | 0.48     | 0.50   | 0.52   | 0.70   |
| 3g5y        | 7.72  | 0.60     | 0.48   | 0.36   | 1.04   | 0.67     | 0.48   | 0.43   | 0.47   |
| 3gjz        | 4.82  | 0.67     | 0.80   | 0.56   | 2.58   | 0.48     | 0.47   | 0.57   | 0.55   |
| 3gnm        | 3.65  | 0.76     | 0.58   | 0.99   | 1.41   | 0.47     | 0.70   | 0.27   | 0.71   |
| 3go1        | 3.17  | 0.43     | 2.23   | 0.95   | 3.48   | 0.65     | 1.05   | 0.95   | 3.52   |
| 3hc4        | 3.15  | 1.05     | 0.46   | 1.13   | 0.92   | 0.53     | 0.52   | 0.37   | 0.20   |
| 3hnt        | 4.28  | 0.59     | 0.65   | 0.84   | 1.68   | 0.59     | 0.40   | 0.93   | 1.87   |
| 3i9g        | 2.80  | 0.29     | 0.50   | 0.55   | 3.85   | 0.57     | 0.64   | 0.46   | 1.00   |
| 3liz        | 5.59  | 0.29     | 0.73   | 0.50   | 4.43   | 0.69     | 0.33   | 0.36   | 0.40   |
| 3lmj        | 2.61  | 0.99     | 3.21   | 7.12   | 6.56   | 0.45     | 0.49   | 0.43   | 2.40   |
| 3m8o        | 11.24 | 0.65     | 1.92   | 1.15   | 7.45   | 0.79     | 1.64   | 0.44   | 0.67   |
| 3mlr        | 5.69  | 0.52     | 0.25   | 1.27   | 5.60   | 0.59     | 0.82   | 0.47   | -      |
| 3mxw        | 4.49  | 0.92     | 0.80   | 1.30   | 1.94   | 0.30     | 0.39   | 0.38   | 0.66   |
| 3nps        | 4.87  | 0.73     | 2.83   | 0.92   | 4.31   | 0.68     | 1.24   | 0.50   | 1.45   |
| 3oz9        | 4.49  | 0.62     | 0.52   | 1.70   | 2.98   | 0.54     | 0.62   | 0.24   | 1.76   |
| 3p0y        | 6.18  | 0.52     | 1.15   | 1.60   | 3.11   | 0.38     | 0.58   | 0.25   | 1.40   |
| 3t65        | 3.02  | 0.42     | 0.27   | 0.66   | 0.43   | 0.36     | 0.75   | 1.04   | 0.40   |
| 3umt        | 8.31  | 0.74     | 1.22   | 0.59   | 3.47   | 0.44     | 0.52   | 0.27   | 0.42   |
| 3v0w        | 4.86  | 0.49     | 0.80   | 0.67   | 2.12   | 0.46     | 0.60   | 0.51   | 0.79   |
| 4f57        | 3.20  | 0.28     | 0.45   | 0.76   | 0.57   | 0.22     | 0.44   | 0.21   | 0.50   |
| 4h0h        | 5.21  | 0.64     | 0.51   | 0.68   | 3.01   | 0.62     | 0.36   | 0.38   | 0.36   |
| 4h20        | 3.30  | 0.79     | 0.51   | 0.50   | 4.45   | 0.33     | 0.67   | 0.73   | 1.51   |
| 4hpy        | 2.38  | 0.64     | 2.61   | 0.56   | 2.45   | 0.30     | 0.50   | 0.35   | 1.42   |
| 4nzu        | 3.24  | 0.59     | 0.65   | 1.03   | 5.11   | 0.49     | 0.49   | 0.41   | 0.91   |
| <b>Mean</b> | 5.26  | 0.58     | 0.86   | 1.00   | 2.94   | 0.51     | 0.63   | 0.52   | 1.03   |
| <b>SD</b>   | 2.46  | 0.20     | 0.65   | 0.98   | 1.59   | 0.15     | 0.26   | 0.23   | 0.73   |

**Table S6. CDR loop RMSD and OCD results for RepertoireBuilder on therapeutic benchmark.**

| Target      | OCD   | H Fr (Å) | H1 (Å) | H2 (Å) | H3 (Å) | L Fr (Å) | L1 (Å) | L2 (Å) | L3 (Å) |
|-------------|-------|----------|--------|--------|--------|----------|--------|--------|--------|
| 1bey        | 2.80  | 0.54     | 1.49   | 0.91   | 3.96   | 0.68     | 0.91   | 0.70   | 0.61   |
| 1cz8        | 0.59  | 0.26     | 0.82   | 0.75   | 3.66   | 0.39     | 0.35   | 0.36   | 0.42   |
| 1mim        | 3.42  | 0.56     | 0.64   | 0.92   | 0.63   | 0.38     | 0.83   | 0.62   | 1.14   |
| 1sy6        | 3.71  | 0.71     | 0.99   | 1.04   | 3.17   | 0.41     | 0.26   | 0.48   | 0.37   |
| 1yy8        | 6.38  | 0.61     | 0.54   | 0.55   | 4.21   | 0.35     | 0.45   | 0.52   | 0.91   |
| 2hwz        | 4.98  | 0.28     | 0.89   | 1.31   | 2.33   | 0.44     | 0.90   | 0.59   | 2.27   |
| 3eo0        | 3.96  | 0.34     | 3.13   | 1.15   | 4.38   | 0.30     | 1.43   | 0.30   | 0.74   |
| 3gkw        | 15.79 | 1.40     | 2.74   | 1.62   | 9.66   | 0.56     | 1.64   | 0.67   | 0.60   |
| 3nfs        | 2.53  | 0.57     | 0.60   | 0.69   | 1.91   | 0.54     | 0.56   | 0.61   | 0.60   |
| 3o2d        | 10.03 | 0.93     | 0.71   | 0.97   | 2.75   | 0.46     | 0.47   | 0.30   | 0.43   |
| 3pp3        | 4.02  | 0.29     | 0.46   | 1.17   | 3.36   | 0.64     | 0.62   | 0.59   | 0.81   |
| 3qwo        | 3.14  | 0.36     | 0.34   | 1.34   | 2.77   | 0.38     | 0.76   | 0.54   | 0.66   |
| 3u0t        | 10.10 | 0.67     | 1.62   | 0.91   | 2.29   | 0.50     | 1.05   | 0.47   | 0.93   |
| 4cni        | 1.46  | 0.60     | 0.89   | 1.26   | 1.28   | 0.63     | 0.51   | 0.52   | 0.59   |
| 4dn3        | 2.36  | 0.49     | 1.54   | 0.93   | 1.74   | 0.33     | 1.36   | 0.52   | 1.44   |
| 4g5z        | 6.55  | 0.49     | 0.84   | 0.57   | 1.51   | 0.61     | 0.40   | 0.69   | 0.68   |
| 4g6k        | 2.36  | 0.62     | 0.51   | 1.22   | 2.95   | 0.67     | 0.57   | 0.46   | 0.93   |
| 4hgz        | 2.29  | 0.26     | 0.42   | 0.83   | 2.98   | 0.37     | 0.38   | 0.48   | 0.61   |
| 4i77        | 5.19  | 0.29     | 1.22   | 0.87   | 3.39   | 0.40     | 0.49   | 0.48   | 0.68   |
| 4irz        | 3.99  | 0.99     | 1.26   | 0.60   | 3.98   | 0.46     | 0.71   | 0.40   | 1.55   |
| 4kaq        | 4.21  | 0.75     | 0.47   | 0.89   | 2.79   | 0.70     | 0.80   | 0.57   | 0.80   |
| 4m6n        | 4.11  | 0.31     | 0.76   | 0.36   | 2.51   | 0.34     | 1.88   | 0.35   | 1.65   |
| 4nyl        | 7.73  | 0.74     | 0.45   | 0.67   | 5.12   | 0.71     | 0.63   | 0.69   | 1.05   |
| 4od2        | 0.89  | 0.63     | 0.49   | 0.76   | 6.49   | 0.51     | 1.11   | 1.25   | 2.14   |
| 4ojf        | 6.62  | 0.76     | 0.59   | 1.32   | 3.84   | 0.39     | 0.58   | 0.40   | 0.57   |
| 4qxg        | 0.82  | 0.42     | 0.45   | 0.76   | 2.06   | 0.47     | 0.52   | 0.66   | 1.81   |
| 4x7s        | 6.16  | 0.77     | 1.72   | 1.18   | 2.71   | 0.45     | 0.45   | 0.28   | 0.69   |
| 4ypg        | 4.22  | 1.05     | 1.15   | 1.09   | 2.87   | 0.49     | 0.33   | 0.93   | 0.82   |
| 5csz        | 2.55  | 0.56     | 0.74   | 0.66   | 2.67   | 0.26     | 0.50   | 0.33   | 1.43   |
| 5dk3        | 5.32  | 0.80     | 0.61   | 1.20   | 2.80   | 0.49     | 0.46   | 0.70   | 0.40   |
| 5ggq        | 1.88  | 0.64     | 0.47   | 0.73   | 0.55   | 0.51     | 0.36   | 0.63   | 0.51   |
| 5ggu        | 4.40  | 0.38     | 0.52   | 0.48   | 6.34   | 0.51     | 0.49   | 0.35   | 0.92   |
| 5i5k        | 3.29  | 1.16     | 0.62   | 1.03   | 4.87   | 0.90     | 0.87   | 0.61   | 1.10   |
| 5jxe        | 3.76  | 0.79     | 0.57   | 1.50   | 2.86   | 0.66     | 0.54   | 0.61   | 0.62   |
| 5kmv        | 3.52  | 0.35     | 0.66   | 0.54   | 0.56   | 0.22     | 0.44   | 0.37   | 0.40   |
| 5l6y        | 1.88  | 0.96     | 0.91   | 0.63   | 5.61   | 0.32     | 0.31   | 0.53   | 1.99   |
| 5n2k        | 1.65  | 0.62     | 0.94   | 0.88   | 3.28   | 0.48     | 0.69   | 0.21   | 4.27   |
| 5nhw        | 3.38  | 0.99     | 0.66   | 0.84   | 1.22   | 0.27     | 1.08   | 0.21   | 4.76   |
| 5sx4        | 7.62  | 1.29     | 0.94   | 1.40   | 2.49   | 0.46     | 0.61   | 0.62   | 0.79   |
| 5tru        | 1.95  | 0.36     | 0.32   | 0.98   | 2.32   | 0.33     | 1.72   | 0.33   | 0.96   |
| 5vh3        | 4.22  | 0.27     | 0.60   | 0.63   | 1.62   | 0.56     | 0.48   | 0.58   | 0.70   |
| 5wuv        | 1.98  | 0.63     | 0.88   | 0.78   | 3.00   | 0.38     | 0.23   | 0.34   | 0.41   |
| 5xyy        | 4.89  | 0.51     | 0.66   | 2.10   | 2.37   | 0.46     | 1.07   | 0.62   | 0.43   |
| 5y9k        | 7.48  | 0.59     | 2.79   | 0.74   | 4.13   | 0.34     | 0.32   | 0.35   | 1.90   |
| 6and        | 6.29  | 0.45     | 0.52   | 1.48   | 2.80   | 0.47     | 0.95   | 0.37   | 0.41   |
| <b>Mean</b> | 4.37  | 0.62     | 0.91   | 0.96   | 3.13   | 0.47     | 0.71   | 0.52   | 1.08   |
| <b>SD</b>   | 2.85  | 0.28     | 0.63   | 0.35   | 1.68   | 0.14     | 0.40   | 0.19   | 0.90   |

**Table S7. CDR loop RMSD and OCD results for ABodyBuilder on RosettaAntibody benchmark.**

| Target      | OCD   | H Fr (Å) | H1 (Å) | H2 (Å) | H3 (Å) | L Fr (Å) | L1 (Å) | L2 (Å) | L3 (Å) |
|-------------|-------|----------|--------|--------|--------|----------|--------|--------|--------|
| 1dlf        | 8.05  | 0.66     | 0.93   | 0.47   | 4.19   | 0.63     | 1.10   | 0.49   | 0.80   |
| 1fns        | 3.07  | 0.38     | 0.52   | 0.52   | 5.44   | 0.55     | 0.83   | 0.42   | 0.84   |
| 1gig        | 11.80 | 0.54     | 0.99   | 0.62   | 4.02   | 0.44     | 0.55   | 1.09   | 0.54   |
| 1jfq        | 5.43  | 0.64     | 0.53   | 1.17   | 1.25   | 0.49     | 0.24   | 0.23   | 0.27   |
| 1jpt        | 3.00  | 0.60     | 0.76   | 1.32   | 1.28   | 0.40     | 1.05   | 0.50   | 0.69   |
| 1mfa        | 2.28  | 0.42     | 0.38   | 0.38   | 0.17   | 0.23     | 0.70   | 0.23   | 0.37   |
| 1mlb        | 4.00  | 0.57     | 0.72   | 1.01   | 0.84   | 0.41     | 0.47   | 0.65   | 0.56   |
| 1mqk        | 4.24  | 0.37     | 0.43   | 0.44   | 2.37   | 0.42     | 1.02   | 0.42   | 2.13   |
| 1nlb        | 3.54  | 0.31     | 0.50   | 0.31   | 2.42   | 0.42     | 1.05   | 0.21   | 0.88   |
| 1oaq        | 3.29  | 0.62     | 0.54   | 0.66   | 1.83   | 0.42     | 0.55   | 0.51   | 1.27   |
| 1seq        | 9.24  | 0.33     | 0.55   | 1.02   | 5.12   | 0.32     | 0.80   | 0.26   | 1.17   |
| 2adf        | 4.38  | 0.21     | 0.73   | 0.74   | 2.07   | 0.54     | 0.60   | 0.33   | 0.53   |
| 2d7t        | 13.72 | 0.76     | 0.69   | 0.82   | 2.88   | 0.48     | 0.73   | 0.37   | 1.26   |
| 2e27        | 4.52  | 0.31     | 0.49   | 0.42   | 4.56   | 0.64     | 0.38   | 0.61   | 2.37   |
| 2fb4        | 2.92  | 0.51     | 0.50   | 0.46   | 5.63   | 0.77     | 0.92   | 0.49   | 1.31   |
| 2fbj        | 6.53  | 0.40     | 0.43   | 0.53   | 1.99   | 0.49     | 1.18   | 0.92   | 2.24   |
| 2r8s        | 1.63  | 0.70     | 4.01   | 2.25   | 6.93   | 0.45     | 0.42   | 0.62   | 0.58   |
| 2v17        | 3.25  | 0.46     | 0.49   | 1.20   | 2.66   | 0.72     | 0.89   | 0.60   | 0.91   |
| 2vxv        | 1.52  | 0.25     | 0.79   | 0.71   | 4.68   | 0.54     | 0.59   | 0.91   | 3.48   |
| 2w60        | 10.18 | 0.30     | 0.46   | 0.65   | 2.49   | 0.60     | 0.57   | 0.66   | 0.35   |
| 2xwt        | 8.91  | 0.54     | 1.21   | 0.60   | 3.51   | 0.34     | 0.40   | 0.90   | 0.82   |
| 2ypv        | 5.96  | 0.51     | 0.86   | 0.90   | 2.67   | 0.61     | 0.33   | 0.28   | 0.78   |
| 3e8u        | 1.81  | 0.56     | 0.58   | 0.98   | 2.24   | 0.31     | 0.53   | 0.50   | 0.40   |
| 3eo9        | 5.51  | 0.42     | 0.57   | 1.51   | 3.04   | 0.54     | 0.57   | 0.59   | 1.49   |
| 3g5y        | 4.70  | 0.24     | 0.39   | 0.38   | 0.94   | 0.71     | 0.28   | 0.49   | 0.60   |
| 3giz        | 2.92  | 0.40     | 0.38   | 0.51   | 2.94   | 0.52     | 0.55   | 0.53   | 0.56   |
| 3gnm        | 5.54  | 0.57     | 0.69   | 0.46   | 2.17   | 0.33     | 0.67   | 0.24   | 0.75   |
| 3go1        | 6.19  | 0.53     | 1.45   | 0.87   | 3.23   | 0.65     | 1.74   | 0.90   | 3.59   |
| 3hc4        | 5.45  | 1.13     | 2.54   | 1.38   | 3.59   | 0.32     | 0.53   | 0.35   | 0.65   |
| 3hnt        | 2.20  | 0.58     | 0.29   | 0.49   | 2.27   | 0.56     | 0.69   | 1.09   | 1.29   |
| 3i9g        | 1.47  | 0.25     | 0.58   | 0.90   | 3.32   | 0.38     | 0.83   | 0.44   | 0.55   |
| 3liz        | 2.68  | 0.48     | 0.65   | 0.54   | 4.38   | 0.61     | 0.37   | 0.27   | 0.72   |
| 3lmj        | 4.17  | 0.50     | 3.10   | 2.78   | 4.88   | 0.60     | 0.59   | 0.81   | 1.02   |
| 3m8o        | 3.18  | 0.93     | 2.31   | 0.86   | 5.67   | 0.74     | 3.00   | 0.56   | 2.19   |
| 3mlr        | 3.98  | 0.51     | 0.80   | 1.24   | 4.93   | 0.54     | 0.75   | 0.74   | -      |
| 3mxw        | 2.70  | 0.92     | 2.07   | 1.26   | 2.74   | 0.57     | 0.61   | 0.55   | 0.97   |
| 3nps        | 2.86  | 0.86     | 3.35   | 1.71   | 5.10   | 0.58     | 1.01   | 0.45   | 1.77   |
| 3oz9        | 6.12  | 0.49     | 0.63   | 0.55   | 2.63   | 0.68     | 0.75   | 0.69   | 2.52   |
| 3p0y        | 4.34  | 0.40     | 0.91   | 1.76   | 2.57   | 0.35     | 0.46   | 0.22   | 1.58   |
| 3t65        | 1.47  | 0.23     | 0.26   | 0.32   | 0.26   | 0.37     | 0.50   | 0.41   | 0.33   |
| 3umt        | 4.64  | 0.44     | 0.82   | 0.92   | 2.67   | 0.47     | 0.95   | 0.51   | 0.43   |
| 3v0w        | 5.99  | 0.43     | 0.83   | 0.83   | 1.53   | 0.26     | 0.36   | 0.25   | 0.38   |
| 4f57        | 3.85  | 0.28     | 0.40   | 0.78   | 0.60   | 0.22     | 0.52   | 0.21   | 0.50   |
| 4h0h        | 5.76  | 0.80     | 0.50   | 1.18   | 1.47   | 0.66     | 0.64   | 0.74   | 0.46   |
| 4h20        | 5.12  | 0.64     | 1.76   | 0.42   | 2.73   | 0.52     | 0.44   | 0.38   | 0.94   |
| 4hpy        | 2.87  | 0.30     | 2.80   | 0.61   | 0.62   | 0.39     | 0.55   | 0.36   | 1.28   |
| 4nzu        | 3.43  | 0.27     | 0.51   | 0.72   | 2.53   | 0.46     | 0.36   | 0.42   | 0.85   |
| <b>Mean</b> | 4.69  | 0.50     | 0.99   | 0.88   | 2.94   | 0.49     | 0.72   | 0.52   | 1.09   |
| <b>SD</b>   | 2.66  | 0.20     | 0.88   | 0.51   | 1.58   | 0.14     | 0.44   | 0.23   | 0.79   |

**Table S8. CDR loop RMSD and OCD results for ABodyBuilder on therapeutic benchmark.**

| Target      | OCD   | H Fr (Å) | H1 (Å) | H2 (Å) | H3 (Å) | L Fr (Å) | L1 (Å) | L2 (Å) | L3 (Å) |
|-------------|-------|----------|--------|--------|--------|----------|--------|--------|--------|
| 1bey        | 2.81  | 0.56     | 1.07   | 1.31   | 3.37   | 0.66     | 0.75   | 0.82   | 1.08   |
| 1cz8        | 1.09  | 0.19     | 0.26   | 0.26   | 0.33   | 0.19     | 0.36   | 0.23   | 0.27   |
| 1mim        | 4.83  | 0.54     | 0.76   | 0.60   | 0.71   | 0.41     | 0.84   | 0.49   | 2.77   |
| 1sy6        | 2.03  | 0.84     | 0.76   | 0.77   | 7.12   | 0.42     | 0.41   | 0.43   | 0.44   |
| 1yy8        | 0.93  | 0.15     | 0.14   | 0.15   | 0.12   | 0.28     | 0.16   | 0.13   | 0.13   |
| 2hwz        | 1.31  | 0.27     | 0.67   | 1.31   | 1.77   | 0.47     | 0.79   | 0.61   | 2.20   |
| 3eo0        | 2.15  | 0.33     | 3.51   | 1.18   | 9.54   | 0.27     | 1.45   | 0.22   | 3.46   |
| 3gkw        | 20.52 | 1.40     | 3.19   | 4.76   | 7.82   | 0.72     | 1.21   | 0.39   | 0.84   |
| 3nfs        | 2.89  | 0.51     | 0.58   | 0.91   | 1.52   | 0.34     | 0.75   | 0.55   | 0.91   |
| 3o2d        | 3.42  | 0.39     | 0.66   | 0.55   | 3.88   | 0.49     | 0.80   | 0.38   | 0.94   |
| 3pp3        | 3.15  | 0.28     | 0.83   | 0.98   | 3.30   | 0.50     | 0.93   | 0.51   | 1.38   |
| 3qwo        | 1.39  | 0.27     | 0.67   | 1.31   | 1.77   | 0.47     | 0.79   | 0.61   | 2.20   |
| 3u0t        | 10.88 | 0.72     | 1.74   | 0.96   | 3.69   | 0.55     | 0.80   | 0.87   | 1.39   |
| 4cni        | 2.52  | 0.36     | 0.58   | 1.08   | 1.09   | 0.51     | 0.40   | 0.45   | 0.86   |
| 4dn3        | 3.15  | 0.48     | 2.52   | 1.94   | 1.93   | 0.48     | 1.34   | 0.47   | 1.63   |
| 4g5z        | 4.89  | 0.43     | 0.37   | 0.52   | 2.15   | 0.65     | 0.87   | 0.76   | 0.71   |
| 4g6k        | 7.37  | 0.55     | 2.57   | 1.30   | 1.38   | 0.73     | 0.79   | 0.26   | 1.53   |
| 4hkz        | 1.50  | 0.33     | 0.41   | 0.74   | 0.15   | 0.36     | 0.37   | 0.35   | 0.74   |
| 4i77        | 1.89  | 0.29     | 1.48   | 1.19   | 2.28   | 0.37     | 0.60   | 0.50   | 1.12   |
| 4irz        | 0.94  | 0.57     | 2.81   | 1.06   | 5.16   | 0.55     | 1.03   | 0.48   | 1.61   |
| 4kaq        | 4.46  | 0.94     | 0.33   | 0.94   | 5.19   | 0.41     | 0.50   | 0.42   | 0.67   |
| 4m6n        | 10.07 | 0.31     | 0.52   | 0.54   | 3.54   | 0.62     | 1.35   | 0.42   | 2.63   |
| 4nyl        | 5.47  | 0.53     | 0.61   | 0.77   | 4.14   | 0.69     | 0.60   | 0.44   | 0.68   |
| 4od2        | 2.30  | 0.53     | 0.51   | 0.67   | 5.41   | 0.58     | 1.60   | 1.51   | 2.19   |
| 4ojf        | 3.17  | 0.48     | 0.46   | 2.13   | 2.70   | 0.33     | 0.88   | 0.60   | 0.60   |
| 4qyg        | 3.87  | 0.41     | 0.66   | 0.71   | 1.64   | 0.46     | 1.81   | 0.77   | 1.31   |
| 4x7s        | 12.37 | 0.66     | 1.63   | 1.09   | 2.94   | 0.36     | 5.18   | 0.38   | 1.28   |
| 4ypg        | 2.70  | 0.42     | 0.81   | 0.64   | 4.17   | 0.40     | 3.29   | 0.86   | 0.79   |
| 5csz        | 2.19  | 0.30     | 0.51   | 0.48   | 3.69   | 0.43     | 1.82   | 0.48   | 0.74   |
| 5dk3        | 3.00  | 0.37     | 0.81   | 1.08   | 2.34   | 0.34     | 1.04   | 0.54   | 0.49   |
| 5ggq        | 3.80  | 0.40     | 0.43   | 0.65   | 2.40   | 0.41     | 0.33   | 0.28   | 0.92   |
| 5ggu        | 2.19  | 0.27     | 0.28   | 0.49   | 4.30   | 0.30     | 0.27   | 0.23   | 0.43   |
| 5i5k        | 7.23  | 1.09     | 1.62   | 2.41   | 2.17   | 0.83     | 1.02   | 0.67   | 1.07   |
| 5jxe        | 3.65  | 0.35     | 0.58   | 0.84   | 2.43   | 0.63     | 0.97   | 0.64   | 0.80   |
| 5kmv        | 6.28  | 0.62     | 0.89   | 1.08   | 0.71   | 0.38     | 0.77   | 0.54   | 1.30   |
| 5l6y        | 3.69  | 0.28     | 0.70   | 0.62   | 3.76   | 0.27     | 0.24   | 0.28   | 2.16   |
| 5n2k        | 2.24  | 0.36     | 0.20   | 0.38   | 2.52   | 0.44     | 0.44   | 0.40   | 5.24   |
| 5nhw        | 3.76  | 0.27     | 0.74   | 0.61   | 0.64   | 0.27     | 0.84   | 0.21   | 4.69   |
| 5sx4        | 4.30  | 1.25     | 1.70   | 1.11   | 3.88   | 0.35     | 0.30   | 0.71   | 0.51   |
| 5tru        | 5.56  | 0.34     | 0.52   | 0.47   | 2.07   | 0.28     | 1.68   | 0.41   | 1.26   |
| 5vh3        | 4.05  | 0.43     | 0.71   | 0.72   | 3.35   | 0.44     | 0.70   | 0.39   | 0.52   |
| 5wuv        | 4.97  | 0.58     | 1.20   | 1.21   | 4.54   | 0.34     | 0.44   | 0.39   | 0.56   |
| 5xyy        | 10.94 | 0.61     | 1.15   | 1.07   | 3.15   | 0.48     | 1.25   | 0.58   | 1.45   |
| 5y9k        | 2.39  | 0.56     | 3.11   | 0.76   | 1.18   | 0.39     | 3.46   | 0.55   | 1.62   |
| 6and        | 2.16  | 0.32     | 0.97   | 1.54   | 2.87   | 0.44     | 0.63   | 0.39   | 0.65   |
| <b>Mean</b> | 4.37  | 0.49     | 1.05   | 1.02   | 3.00   | 0.45     | 1.04   | 0.50   | 1.35   |
| <b>SD</b>   | 3.67  | 0.26     | 0.86   | 0.73   | 1.97   | 0.14     | 0.92   | 0.23   | 1.06   |



**Note S1. RosettaAntibody grafting command.**

```
antibody.linuxgccrelease -fasta 1dlf.fasta -exclude_pdb 1dlf 1c5c 2dlf 1wz1  
1c5b
```

## References

1. Warszawski, S., Borenstein Katz, A., Lipsh, R., Khmelnsky, L., Ben Nissan, G., Javitt, G., Dym, O., Unger, T., Knop, O., Albeck, S., et al. (2019). Optimizing antibody affinity and stability by the automated design of the variable light-heavy chain interfaces. *PLOS Comput. Biol.* *15*, e1007207. [10.1371/journal.pcbi.1007207](https://doi.org/10.1371/journal.pcbi.1007207).
